# Supplementary material
Source: publisher site journal article supplement (https://www.dovepress.com/article/301113)
Supplement: Supplementary file 1 [file get_supplementary_file.php]

## **Supplemental Material**

### **1. Supplemental Figure 1**

# Supplemental Figure 1

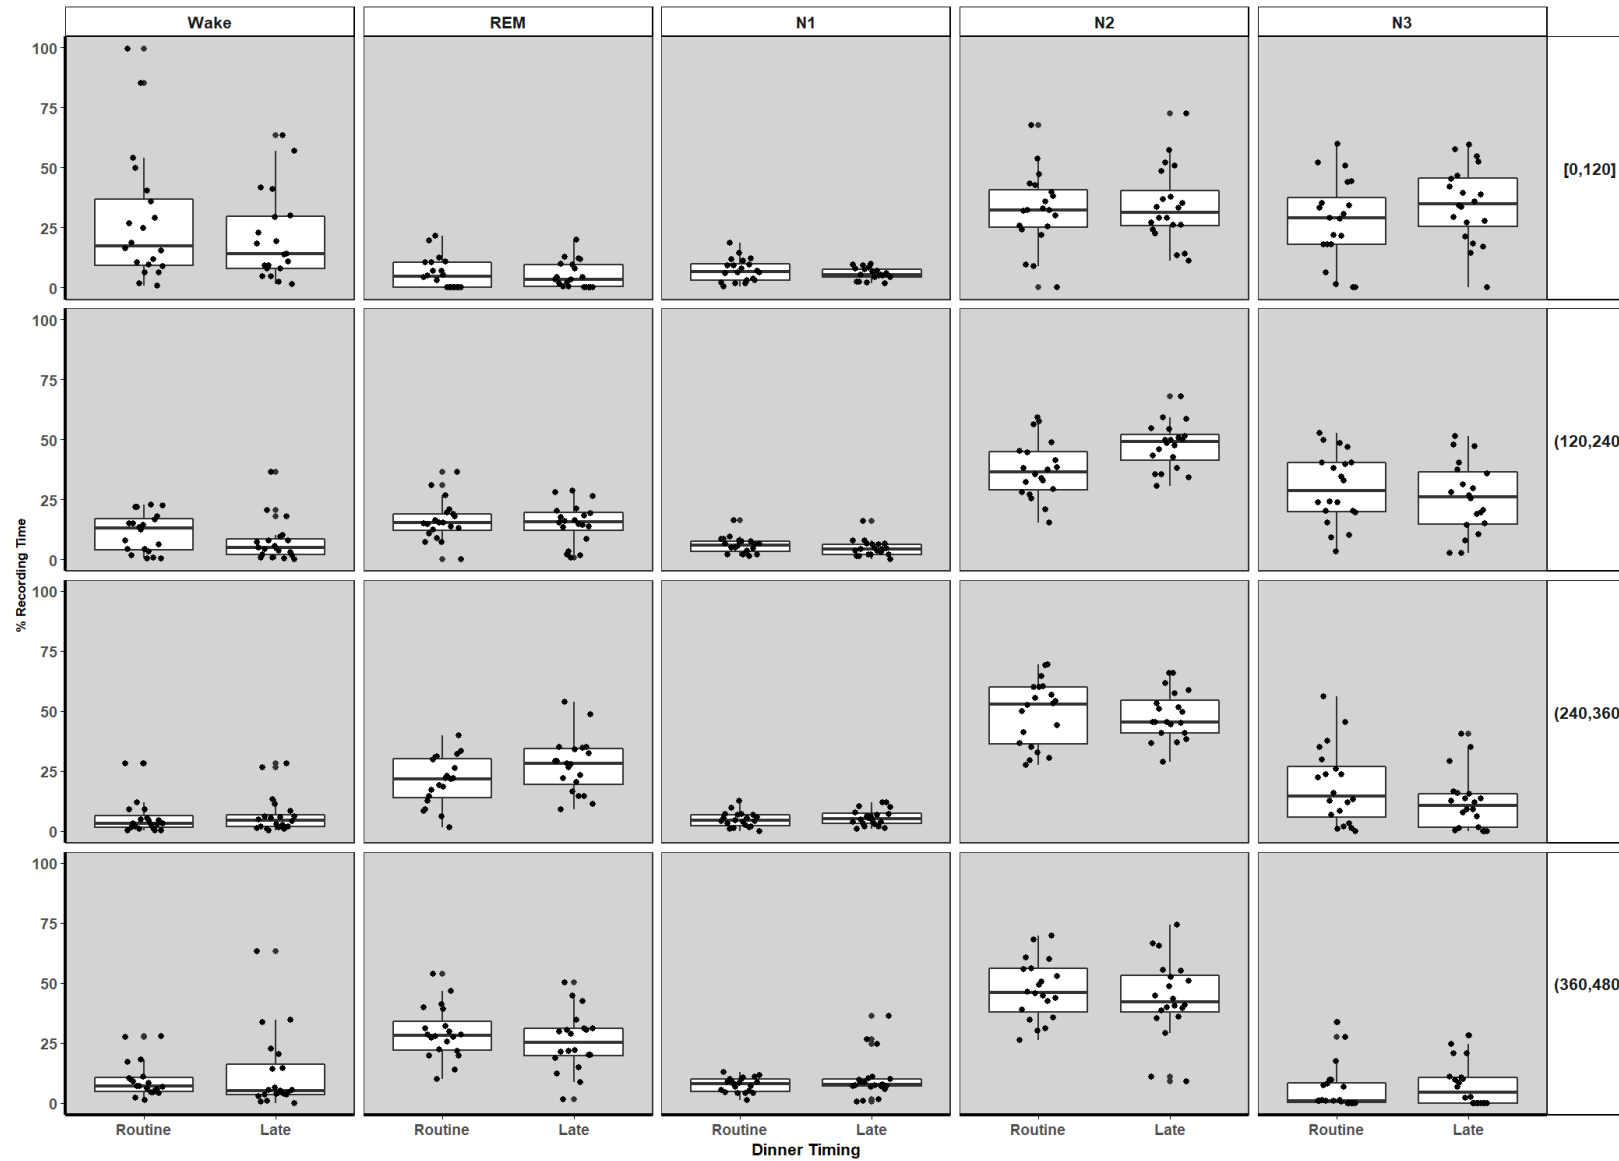

## **Supplemental Figure 1. Distributions of Each Sleep Stage in Four Quarters of the Night for Routine and Late Dinner**

Boxplots show the percentages of each sleep stage for routine dinner vs late dinner across the four quarters of the night: first quarter (0-120 minutes), second quarter (120-240 minutes), third quarter (240-360 minutes), fourth quarter (360-480 minutes).

Comparisons between routine dinner vs late dinner were only significant for N2 sleep in the second quarter (49.0% vs 36.5% for late vs routine;  $p=0.0056$ ) and REM sleep in the third quarter (28.1% vs 21.9% for late vs routine;  $p=0.035$ ).
